# Supplementary material for: Effects of different vibration frequencies on muscle strength, bone turnover and walking endurance in chronic stroke
Source: PubMed Central journal article supplement (PMC7794423; doi:10.1038/s41598-020-80526-4), 2021-01-08
Supplement: 41598_2020_80526_MOESM1_ESM.pdf [file 41598_2020_80526_MOESM1_ESM.pdf]

## Effects of different vibration frequencies on muscle strength, bone turnover and walking endurance in chronic stroke

Authors: Zhenhui Yang, Tiev Miller, Zou Xiang, Marco Y. C. Pang

### Supplemental Table. Outcome measurements (On-protocol analysis)

| Variable                                 | 20Hz WBV<br>(N = 40) |            |                 | 30Hz WBV<br>(N = 40) |             |                 | Between-group<br>difference in<br>change scores | Comparisons   |       |       |       |       |       |
|------------------------------------------|----------------------|------------|-----------------|----------------------|-------------|-----------------|-------------------------------------------------|---------------|-------|-------|-------|-------|-------|
|                                          | Pre                  | Post       | Change<br>score | Pre                  | Post        | Change<br>score |                                                 | Mean (95% CI) | $p^a$ | $p^b$ | $p^c$ | $p^d$ | $p^e$ |
| <b>Knee extensor work (J)</b>            |                      |            |                 |                      |             |                 |                                                 |               |       |       |       |       |       |
| Nonparetic<br>concentric <sup>*†‡§</sup> | 28.3±10.9            | 36.4±17.4  | 8.2±12.6        | 24.0±11.0            | 37.4±23.4   | 13.4±17.8       | 5.3 (-1.6, 12.2)                                | 0.084         | 0.000 | 0.131 | 0.000 | 0.000 | 0.131 |
| Paretic<br>concentric <sup>*†‡§</sup>    | 17.6±8.2             | 22.9±8.9   | 5.3±5.1         | 15.5±8.2             | 21.6±9.8    | 6.0±4.8         | 0.78 (-1.4, 3.0)                                | 0.260         | 0.000 | 0.483 | 0.000 | 0.000 | 0.483 |
| Nonparetic<br>eccentric <sup>*†‡§</sup>  | 80.8±20.6            | 94.5±22.9  | 14.9±13.4       | 75.8±20.1            | 95.5±30.2   | 21.4±21.0       | 6.5 (-1.4, 14.3)                                | 0.273         | 0.000 | 0.104 | 0.000 | 0.000 | 0.104 |
| Paretic<br>eccentric <sup>*†‡§¶</sup>    | 65.4±21.5            | 73.0±18.7  | 8.2±11.4        | 61.0±23.2            | 74.0±1.6    | 14.5±15.6       | 6.2 (0.16, 12.29)                               | 0.377         | 0.000 | 0.044 | 0.000 | 0.000 | 0.044 |
| <b>Other Outcomes</b>                    |                      |            |                 |                      |             |                 |                                                 |               |       |       |       |       |       |
| NTx<br>(nM BCE) <sup>*†‡§</sup>          | 5.9±3.7              | 3.6±2.3    | -2.3±3.4        | 6.4±4.3              | 3.6±1.8     | -2.8±4.0        | -0.5 (-2.2, 1.2)                                | 0.607         | 0.000 | 0.535 | 0.000 | 0.000 | 0.535 |
| 6MWT<br>distance (m)                     | 249.7±92.0           | 251.7±92.4 | 2.0±12.2        | 262.0±111.2          | 261.7±112.4 | -0.4±11.3       | -2.4 (-7.6, 2.8)                                | 0.590         | 0.533 | 0.365 | 0.302 | 0.835 | 0.365 |

\*Significant time effect ( $p < 0.05$ )

†Significant group × time interaction effect ( $p < 0.05$ )

‡Significant within-group comparison (20Hz WBV group) ( $p < 0.05$ )

§Significant within-group comparison (30Hz WBV group) ( $p < 0.05$ )

<sup>†</sup>Between-group comparison of change score ( $p < 0.05$ )

<sup>a</sup>Baseline comparisons (independent t-test)

<sup>b</sup>Time effect (ANOVA)

<sup>c</sup>Group  $\times$  time interaction effect (ANOVA)

<sup>d</sup>Within-group comparison (20Hz WBV group) (paired t-test)

<sup>e</sup>Within-group comparison (30Hz WBV group) (paired t-test)

<sup>f</sup>Between-group comparison of change score (independent t-test)

Abbreviations: 20Hz WBV: 20Hz whole-body-vibration group, 30Hz WBV: 30Hz whole-body-vibration group, CI: confidence interval, NTx: serum cross-linked N-telopeptides of type I collagen, 6MWT: 6-minute walk test
